# Supplementary material for: SETDB1 modulates PRC2 activity at developmental genes independently of H3K9 trimethylation in mouse ES cells
Source: HighWire-hosted journal article supplement (doi:10.1101/gr.177576.114), 2015-07-09

## Supplementary figure legends

**Figure S1. Antibody specificity test using ELISA.** The specificity of three H3K9me3 antibodies against various methylated or un-methylated histone peptides was tested using an ELISA assay. The plates were coated with 1 $\mu$ g/ml peptides overnight. Then the plates were blocked with 3% BSA in PBS at room temperature for 30 minutes and incubated with the primary antibodies (1:3000) for 3 hours at room temperature. The primary H3K9me3 antibodies tested are 39161 (Active Motif), 07-442 (Millipore), and 8898 (Abcam). The primary antibodies were diluted in ChIP reaction buffer (Millipore ChIP Kit, 90% Sample dilution buffer with 10% Lysis buffer). After rinses with PBS, plates were incubated with HRP-conjugated secondary antibodies (Promega) diluted in PBS for 1 hour at room temperature. After then rinses with PBS, the plates were incubated with the substrate and stop solution (R&D) and lastly read the absorbance at A450 (ELISA signal) and A540 (correction for plate background). The Y-axis represents the relative activity value determined using A450-A540.

**Figure S2. Comparison of H3K9me3 signal around SETDB1 peaks based on different H3K9me3 ChIP-seq experiments.** (A-H) Density plot showing the enrichment of H3K9me3 within the  $\pm 1$  kb regions of the SETDB1 binding sites (from Yuan *et al.*) based on eight different ChIP-seq experiments. Respective H3K9me3 ChIP-seq data for mouse ES cells generated in current research, and previous researches from Yuan *et al.* (GSE17642), Bilodeau *et al.* (GSE18371), Karimi *et al.* (two ES cell lines: J1 and TT2, GSE29413) were utilized. Kernel density estimation, a non-parametric way to estimate the probability density function of a random variable, was used here. The scale of y-axis indicates the possibility to observe H3K9me3 ChIP-seq reads intensity (log<sub>10</sub>-transformed) as a certain value (for example, x) in SETDB1 binding sites. (I-P) Average profiles of H3K9me3 ChIP-seq signal around SETDB1 solo and

ensemble peaks. SETDB1 solo and ensemble peaks were defined using SETDB1 ChIP-seq data from Yuan *et al.* and H3K9me3 ChIP-seq data from current research. All profiles were centered at the middle 1 bp of the SETDB1 binding regions. The average signal represents the average value of wiggle files (generated by MACS2) across a category of binding regions per 50-bp interval.

**Figure S3. Confirmation of SETDB1 binding at SETDB1 targets by ChIP-qPCR.** ChIP-qPCR was applied to confirm the SETDB1 binding at the SETDB1 solo and ensemble peaks. *Setdb1* iKO mES cells were treated with or without Tamoxifen and subjected to ChIP with SETDB1 antibody. Anti-rabbit normal IgG was used as the negative control. The selected SETDB1 peak loci were marked by their nearby gene symbols (*Atf4*, *Lhx2*, *Ascl1* for SETDB1 solo peaks; *Fam21*, *Gm6792*, *Sfi1* for SETDB1 ensemble peaks). Deletion of *Setdb1* diminished SETDB1 binding at all of these sites.

**Figure S4. Examination of H3K9me1 and H3K9me2 levels at SETDB1 solo and ensemble peaks.** ChIP-qPCR was applied to assess H3K9me1 and H3K9me2 levels at selected SETDB1 solo and ensemble peaks, respectively. It appears that SETDB1 solo peaks are generally devoid of H3K9me1 and H3K9me2 as well. The selected SETDB1 peak loci were marked by their nearby gene symbols (*Atf4*, *Lhx2*, *Ascl1*, *Foxa1*, *Tbx3* for SETDB1 solo peaks; *Fam21*, *Gm6792*, *Sfi1* for SETDB1 ensemble peaks).

**Figure S5. Confirmation of *Setdb1* deletion in iKO mES cells before neural differentiation.** The iKO cells were culture in adherent and treated with Tamoxifen for three days to induce *Setdb1* deletion. The deletion efficiency was confirmed by western blot analysis.

**Figure S6. Neural differentiation upon Tamoxifen treatment in control D3**

**mouse ES cells.** Control D3 cells were treated and assessed for neural differentiation the same as in iKO cells (**Fig. 2C**). No increased neural differentiation was seen from the Tamoxifen treatment. Scale bar = 50  $\mu\text{m}$  (100  $\mu\text{m}$  in the inserts).

**Figure S7. Relative binding level for 43 TFs at all SETDB1 ensemble and neural unrelated solo peak loci. (A-B)** The calculation of relative binding level was in the same way described for **Fig 3A** and the horizontal line represented the average binding intensity across all SETDB1 peaks.

**Figure S8. Summary of GO biological process enrichment analysis for target genes of SETDB1 solo peaks. (A)** SETDB1 solo peaks were divided into 3 groups based on the peak calling cutoffs for H3K9me3 data from current research. The looser the cutoff for H3K9me3 peak calling was, the more stringent standard for SETDB1 solo peaks would be. Each group stands for the SETDB1 solo peaks defined with certain stringent standard. **(B)** GO biological process enrichment analysis of target genes for different groups of SETDB1 solo peaks via DAVID interface (<http://david.abcc.ncifcrf.gov/>). Fisher's exact test and Benjamini correction were performed.

**Figure S9. Average profile of H3K27me3, EZH2, SUZ12 and RNF2 round the SETDB1 solo peaks generated by different MACS cutoffs. (A-D)** Solo peak numbers in different categories were listed in Figure S7 (A). All binding sites were extended to 10,000 bp and aligned by the center of the peak region detected by MACS2.

**Figure S10. H3K9me3 and H3K27me3 enrichment profiles among SETDB1 targets.** X-axis stands for normalized signal of H3K9me3 and Y-axis represents the normalized signal of H3K27me3 in control ES cells. SETDB1 binding sites were divided into two groups, solo and ensemble peaks and then

extended to the same width (5 kb upstream and downstream of peak center). The red dot points represent SETDB1 ensemble peaks whilst the green ones stand for SETDB1 solo peaks. For most SETDB1 solo peak regions, signal of H3K9me3 is comparative lower than that in SETDB1 ensemble peak region but the H3K27me3 enrichment level is much higher at a subset of SETDB1 solo peaks.

**Figure S11. Confirmation of target knocking down efficiency of shEZH2.**

*Setdb1* iKO mES cells were cultured in adherent and infected with lentiviral shRNA against EZH2. 48 hours after the infection, the cells were selected in 1 µg/ml puromycin for another 48 hours to enrich infected cells. The target knocking down efficiency was assessed by Western blot analysis. The shRNA efficiently knocked down EZH2 expression accompanied by a significant reduction of global H3K27me3 as compared with the control shRNA (scramble sequence) or the no virus infected cells.

**Figure S12. H3K27me3 level variation at all ±10-kb regions of EZH2 peak loci before and after *Setdb1* iKO.** Only EZH2 peaks with enriched H3K27me3 signal before Tam treatment were included in this analysis (biological replicate pair 2 of current research). Those EZH2 peaks were divided into two categories based on the overlap status with SETDB1 binding: with SETDB1 binding (475 peaks) and without SETDB1 binding (14,143 peaks). Two-sided Welch's *t* test was performed for the change of H3K27me3 between the two groups (\*\* *P* < 0.01).

**Figure S13. *Setdb1* deletion does not affect overall protein complex stability.** *Setdb1* iKO mES cells were treated with Tamoxifen for three days and assayed for EZH2, SUZ12 expression and histone H3K27 methylation by Western blot analysis. No reduction of EZH2, SUZ12 protein or global H3K27 methylation was seen.



**Figure S14. Quality control of H3K9me3 and H3K27me3 ChIP-seq data in this study.** (A-H) Correlation between H3K9me3 or H3K27me3 ChIP-seq signals and gene expression level was evaluated. One public RNA-seq dataset in mES (GSM1499144) was used and all genes were divided into three categories according to their FPKM values: low (0~10), moderate (10~100), and high (>100). For each H3K9me3 (A-D) or H3K27me3 (E-H) ChIP-seq biological replicate generated in this study, the average signal profiles across gene bodies for each gene category were drawn. (I-J) Fold enrichment score was used to demonstrate the signal enrichment for the MACS2-detected peaks in each H3K9me3 (I) or H3K27me3 (J) ChIP-seq experiment.

**Figure S15. Correlation between ChIP-seq datasets generated in this study and public H3K9me3 or H3K27me3 ChIP-seq datasets in mES.** (A) H3K9me3 ChIP-seq data for mES cells generated in current research, and previous researches from Yuan *et al.* (GSE17642), Bilodeau *et al.* (GSE18371), Karimi *et al.* (two ES cell lines: J1 and TT2, GSE29413) were used. Pearson correlation coefficient between signals at promoter regions (from 2kb upstream to 2kb downstream of TSS) of any two H3K9me3 ChIP-seq datasets was calculated. (B) H3K27me3 ChIP-seq data for mES cells generated in current research (without Tam treatment), and previous researches from Lienert *et al.* (GSE27827) and Stadler *et al.* (GSE30203) were utilized. Pearson correlation coefficient between signals at promoter regions (from 2kb upstream to 2kb downstream of TSS) of any two H3K27me3 ChIP-seq datasets was calculated.

### Supplementary tables

**Table S1.** List of transcription regulators used in the measurement for the level

of co-binding between SETDB1 and other factors

| Transcription regulator | Peak number | GEO Accession ID |
|-------------------------|-------------|------------------|
| ATF7IP                  | 5064        | GSE26680         |
| CHD7                    | 5352        | GSE22341         |
| MYC                     | 6184        | GSE11431         |
| CTCF                    | 30300       | GSE25777         |
| CTR9                    | 2182        | GSE20530         |
| DPY30                   | 36708       | GSE26136         |
| E2F1                    | 29936       | GSE11431         |
| ESRRB                   | 83541       | GSE11431         |
| EZH2                    | 18301       | GSE18776         |
| JARID2                  | 7292        | GSE18776         |
| KDM2A                   | 28556       | GSE18588         |
| KDM5A                   | 9291        | GSE18776         |
| KLF4                    | 11987       | GSE11431         |
| LAMINB                  | 52567       | GSE28247         |
| MED1                    | 26148       | GSE22557         |
| MED12                   | 28541       | GSE22557         |
| MTF2                    | 6255        | GSE16526         |
| NANOG                   | 19318       | GSE11724         |
| NIPBL                   | 14357       | GSE22557         |
| MYCN                    | 7742        | GSE11431         |
| NR5A2                   | 3072        | GSE19019         |
| POU5F1                  | 26804       | GSE11724         |
| EP300                   | 3290        | GSE22341         |
| REST                    | 9224        | GSE27841         |
| RBBP5                   | 12656       | GSE22934         |
| RNAP2                   | 18491       | GSE12680         |
| RNF2                    | 8657        | GSE26680         |
| SETDB1                  | 5882        | GSE17642         |
| SMAD3                   | 2040        | GSE21614         |
| SMARCA4                 | 3780        | GSE14344         |
| SMC1A                   | 60633       | GSE22557         |
| SMC3                    | 31443       | GSE22562         |
| SOX2                    | 4516        | GSE11431         |
| STAT3                   | 6355        | GSE11431         |
| SUPT5H                  | 8215        | GSE20530         |
| SUZ12                   | 38174       | GSE18776         |
| TAF1                    | 7992        | GSE30959         |
| TAF3                    | 51014       | GSE30959         |
| TCF3                    | 6113        | GSE11724         |
| TCFCP2L1                | 43947       | GSE11431         |
| TET1                    | 34697       | GSE26832         |
| WDR5                    | 4877        | GSE22934         |

|       |       |          |
|-------|-------|----------|
| WHSC2 | 21684 | GSE20530 |
| ZFX   | 13784 | GSE11431 |

Forty-three transcription factors known to be involved in ES cell regulation were selected for co-binding analysis with SETDB1. Listed are the factor name, the number of detected peak and the GEO accession ID from which the data were generated.

**Table S2. List of primers used in this study**

| ChIP qPCR primers | Sequences (5'-- 3')                          |
|-------------------|----------------------------------------------|
| <i>Ascl1</i>      | GAACCCGCCATAGAGTTCAA<br>GTTGGTCAACCTGGGTTTTG |
| <i>Lhx2</i>       | AGTGGAAGGGGAGTGGAAGT<br>GGTCACGATCAACGGAAAGT |
| <i>Atf4</i>       | CGTCAGAGCTTTGGCTAGGT<br>GGGGTAACTGTGGCGTTAGA |
| <i>Sfi1</i>       | AGACTCCCAATACCCACACG<br>GCCTCCCACAAATGACTGTT |
| <i>Gm6792</i>     | CACTTCCAGGCAGCTAGGAC<br>CAGAATTCCCAGGCTGACAT |
| <i>Fam21</i>      | TGGGATACTTGCCTTTCCTG<br>TTCTTGGCAATGTGTGTGGT |
| <i>Faah</i>       | AACGGTCAAGGTCAAGCCTA<br>TTCTGAGGACCCTGGCTTAG |
| <i>Pou3f1</i>     | GTTCTCGCAGACCACCATCT<br>GGCTTGGGACACTTGAGAAA |
| <i>Tcfap2e</i>    | GGACCCGAGTCTACTCACCA<br>ACCCCGTACCTTCTGGACTC |
| <i>Foxo6</i>      | GGTGCCAGGACTGGTTAAGA<br>TAAGCCACCCAACTCCAATC |
| <i>Rnf220</i>     | AGGACAGCCAGTTAGCCTGA<br>CTCCAGCCAGCCTGCTATAC |
| <i>Tbx3</i>       | GCTGCTGCGAACTCTCTTCT<br>ACCAATTGTGTGGCTGCATA |
| <i>Foxa1</i>      | GCAACCGGGTCAAGTTGGT<br>CAAGTCGTTGGAGTAGTTGGG |
| <i>Nr2f1</i>      | CACCAAGGCGAGAGAGAAAG<br>ACAGGAACTGTCCCATCGAC |
| RT qPCR primers   | Sequences (5'--3')                           |
| <i>Foxa2</i>      | CCCTACGCCAACATGAACTCG                        |

|               |                         |
|---------------|-------------------------|
|               | GTTCTGCCGGTAGAAAGGGA    |
| <i>Pax7</i>   | TCTCCAAGATTCTGTGCCGAT   |
|               | CGGGGTTCTCTCTTATACTCC   |
| <i>Nr2f2</i>  | TCAACTGCCACTCGTACCTG    |
|               | CCATGATGTTGTTAGGCTGCAT  |
| <i>Nr2f1</i>  | GCACTACGGCCAATTCACCT    |
|               | TTGGAGGCATTCTTCCTCGC    |
| <i>Hmx2</i>   | CCAAGCCCTAAGCACCATAACC  |
|               | TCCTTAAAGTCCGGGTGAGAAG  |
| <i>Zic1</i>   | CAGTATCCCGCGATTGGTGT    |
|               | GCGAACTGGGGTTGAGCTT     |
| <i>Lhx5</i>   | AATGTGTTCAATGCTGCGAGT   |
|               | AAAGCGCCTGAAAAAGTCGTT   |
| <i>Hoxc8</i>  | CTTCGTCAACCCCCTGTTTTC   |
|               | GTCTTGGACGTGGTGCGAG     |
| <i>Evx1</i>   | GAGAGCCGAAAGGACATGGTT   |
|               | CTGCCTGCTAGTCCATCGAC    |
| <i>Ascl1</i>  | GCAACCGGGTCAAGTTGGT     |
|               | CAAGTCGTTGGAGTAGTTGGG   |
| <i>Uncx</i>   | ACCCGCACCAACTTTACCG     |
|               | TGAACTCGGGACTCGACCA     |
| <i>Hoxd3</i>  | ATACTACGAGAACCCAGGACTC  |
|               | CAGGTCTCATACAGCTACCATTG |
| <i>Fezf1</i>  | ACGCGACCACCAAAATGCTA    |
|               | TCGACGAGTTGAGATGCAGAG   |
| <i>Hoxb8</i>  | TGCGCCCCAATTATTATGACTG  |
|               | AACTCCTGGATTTGCGAAGGG   |
| <i>Gfra1</i>  | CACTCCTGGATTTGCTGATGT   |
|               | AGTGTGCGGTACTTGGTGC     |
| <i>Hoxd9</i>  | GCACCCTCAGCAACTACTACG   |
|               | AAAACCTACACGAGGCGAACTC  |
| <i>Fev</i>    | ACGCCTACCGCTTTGACTTC    |
|               | AAGCTGCCATCAAGTTGAGTT   |
| <i>Hoxb2</i>  | ATTCGCCTTTTCTACCGGACC   |
|               | GGGCTATCGAGAGAACCCTG    |
| <i>Irx5</i>   | TACAGCACCAGCGTCATTTCG   |
|               | GAGCCCACGTAAGAGAAGGC    |
| <i>Barhl2</i> | GCGGGTCGAGTTTTGGAATAG   |
|               | GCTCCTAAAATCCGTTGTCCTC  |
| <i>Lrp2</i>   | GAAAGCTGGACAAGACTGAGTT  |
|               | GGCAGTGGTCTGTGAGAATTT   |
| <i>Foxa1</i>  | ACATTCAAGCGCAGCTACCC    |
|               | TGCTGGTTCTGGCGGTAATAG   |
| <i>Sema6a</i> | CGAGACGGGTATGAGTCTAGG   |

|                |                         |
|----------------|-------------------------|
|                | CCTGGTGGTTATGAGAGGACAC  |
| <i>Lmx1b</i>   | TCCTGGCACGAGGAGTGTT     |
|                | AACTCGGTAGGGGCGATCTT    |
| <i>Pax3</i>    | TTTCACCTCAGGTAATGGGACT  |
|                | GAACGTCCAAGGCTTACTTTGT  |
| <i>Satb2</i>   | GCCGTGGGAGGTTTGATGATT   |
|                | ACCAAGACGAACTCAGCGTG    |
| <i>Foxg1</i>   | CAAGGCTGACGCACTTGGA     |
|                | CTTGCCGTTCTTCTTGTCGC    |
| <i>Hoxb3</i>   | GCACCTGGAGGGTGACTAC     |
|                | CCCCCGTTATTGCTGTTGC     |
| <i>Six1</i>    | ATGCTGCCGTCGTTTGGTT     |
|                | CCTTGAGCACGCTCTCGTT     |
| <i>Otp</i>     | CAGGCTAGGTATGAAAGATGCC  |
|                | GAAGCAGGGGTAGAGCCCA     |
| <i>Lhx2</i>    | CTGTTCCACAGTCTGTCTGGG   |
|                | CAGCAGGTAGTAGCGGTCAG    |
| <i>Gfra2</i>   | TCTTTTGTAGACGAAACCCTCCG |
|                | CCAGCATGGTATTGCGATCC    |
| <i>Egr3</i>    | TTGCCTGACAATCTGTACCCC   |
|                | TAATGGGCTACCGAGTCGCT    |
| <i>Nkx2-1</i>  | AGGACACCATGCGGAACAG     |
|                | CCATGCCGCTCATATTCATGC   |
| <i>Neurog2</i> | AACTCCACGTCCCCATACAG    |
|                | GAGGCGCATAACGATGCTTCT   |
| <i>Pitx1</i>   | GCCTTCAAGGGAGGCATGAG    |
|                | GATTCGCTGGCGGAGTTCTC    |
| <i>Sall3</i>   | TGGAGGTATCTACGGACAAGG   |
|                | GGGTCACATTGGTACTAGGCA   |
| <i>Tbx3</i>    | AGATCCGGTTATCCCTGGGAC   |
|                | CAGCAGCCCCCACTAACTG     |
| <i>Prdm6</i>   | GGAGCCTAGTAAGTCGAGCTG   |
|                | GGACGTTCAAGTTTTCATCCTGG |
| <i>Pou4f2</i>  | TGGACATCGTCTCCAGAGTA    |
|                | GTGTTTCATGGTGTGGTAAGTGG |
| <i>Zic2</i>    | CAAGGTCCGGGTGCTTACC     |
|                | ATTAAAGGGAGGCCCCGAATA   |
| <i>Hnf1b</i>   | AGGGAGGTGGTTCGATGTCA    |
|                | TCTGGACTGTCTGGTTGAACT   |
| <i>Sema5b</i>  | GAAGCCGTGGGTCTTTAACTT   |
|                | CAAGAGCAAGCTGGGAGAAAT   |
| <i>Otx2</i>    | TATCTAAAGCAACCGCCTTACG  |
|                | GCCCTAGTAAATGTCGTCCTCTC |
| <i>Rax</i>     | TGGGCTTTACCAAGGAAGACG   |

|               |                                                                                              |
|---------------|----------------------------------------------------------------------------------------------|
| <i>Eomes</i>  | GGTAGCAGGGCCTAGTAGCTT<br>GCGCATGTTTCCTTTCTTGAG<br>GGTCGGCCAGAACCACTTC<br>GCTCCCGGCTTCTCTTACC |
| <i>Six3</i>   | CGGCGAAGTTTGGCAACAAG<br>AAGCACACCTTGACTGGTACG<br>AAGTGGACGTTTGCACCTTCA                       |
| <i>Ascl2</i>  | ACAGGAGTACGAGATCGAACG<br>CTCTGTACACAGCACTCGGAG<br>CCCTGCTCCAAGTGGTACAG                       |
| <i>Sim1</i>   | TCACAGTCAGTCAGATAGGAGG<br>ATGGGGTCTCTGGTTCTGC<br>CAATACCATCTTGCTCCGTGAA                      |
| <i>Faah</i>   | TACCGCGAAGTGCAGAAGC<br>CGTGGGTAGCCATTGAGGG<br>GAGCCCGCCAAGTAAAAACAG                          |
| <i>Bmp1</i>   | GTGCTTTGCCGTAAAAGGAC<br>CCCCGGACAAGAGACTCAC<br>CGACAGGTTGTGCCGAATG                           |
| <i>Pou3f1</i> | CCAGGACAGTATAGTGGAGATCC<br>AGTAGACCCGCGACCCATAG<br>AGTCCCAAGGAGAAAAACCGA                     |
| <i>Alx1</i>   | GCTGTGTTTCAGGTAGCTGAC<br>CCACCAGGGTTATGCTGGG<br>CGTGGAGAGGGGATAAGGAGTTA                      |
| <i>Foxo6</i>  | GGCTGGTCCTCCAAACACAA<br>CCCTGGGTCTCTTGCCTCT<br>CAACTTCGACAAAGCCGAGG                          |
| <i>Fgf2</i>   | ACTCGTCTTTCCTTGCCCT<br>GGAGGAACTTCGTCAGTACATTG<br>TCTTTCTGTAGTACCCACGTCTC                    |
| <i>Hes5</i>   | AATGGATTTGGACGCATTGGT<br>TTTGCACCTGGTACGTGTTGAT                                              |
| <i>Hoxa1</i>  |                                                                                              |
| <i>Cbx2</i>   |                                                                                              |
| <i>Gbx2</i>   |                                                                                              |
| <i>Setdb1</i> |                                                                                              |
| <i>Gapdh</i>  |                                                                                              |

**Table S3.** Summary of ChIP-seq datasets generated in this study.

| ChIP-seq experiment              | Uniquely mapped reads | Library complexity |
|----------------------------------|-----------------------|--------------------|
| H3K9me3 Replicate 1 (single-end) | 22.7 M                | 0.591              |
| H3K9me3 Replicate 2 (paired-end) | 14.3 M                | 0.810              |
| H3K9me3 Replicate 3 (paired-end) | 16.6 M                | 0.831              |

|                                                   |        |       |
|---------------------------------------------------|--------|-------|
| H3K9me3 Replicate 4<br>(paired-end)               | 15.4 M | 0.838 |
| H3K27me3 DMSO-treated<br>Replicate 1 (single-end) | 18.6 M | 0.935 |
| H3K27me3 Tam-treated<br>Replicate 1 (single-end)  | 22.8 M | 0.655 |
| H3K27me3 DMSO-treated<br>Replicate 2 (paired-end) | 24.5 M | 0.763 |
| H3K27me3 Tam-treated<br>Replicate 2 (paired-end)  | 24.7 M | 0.587 |

Figure S1

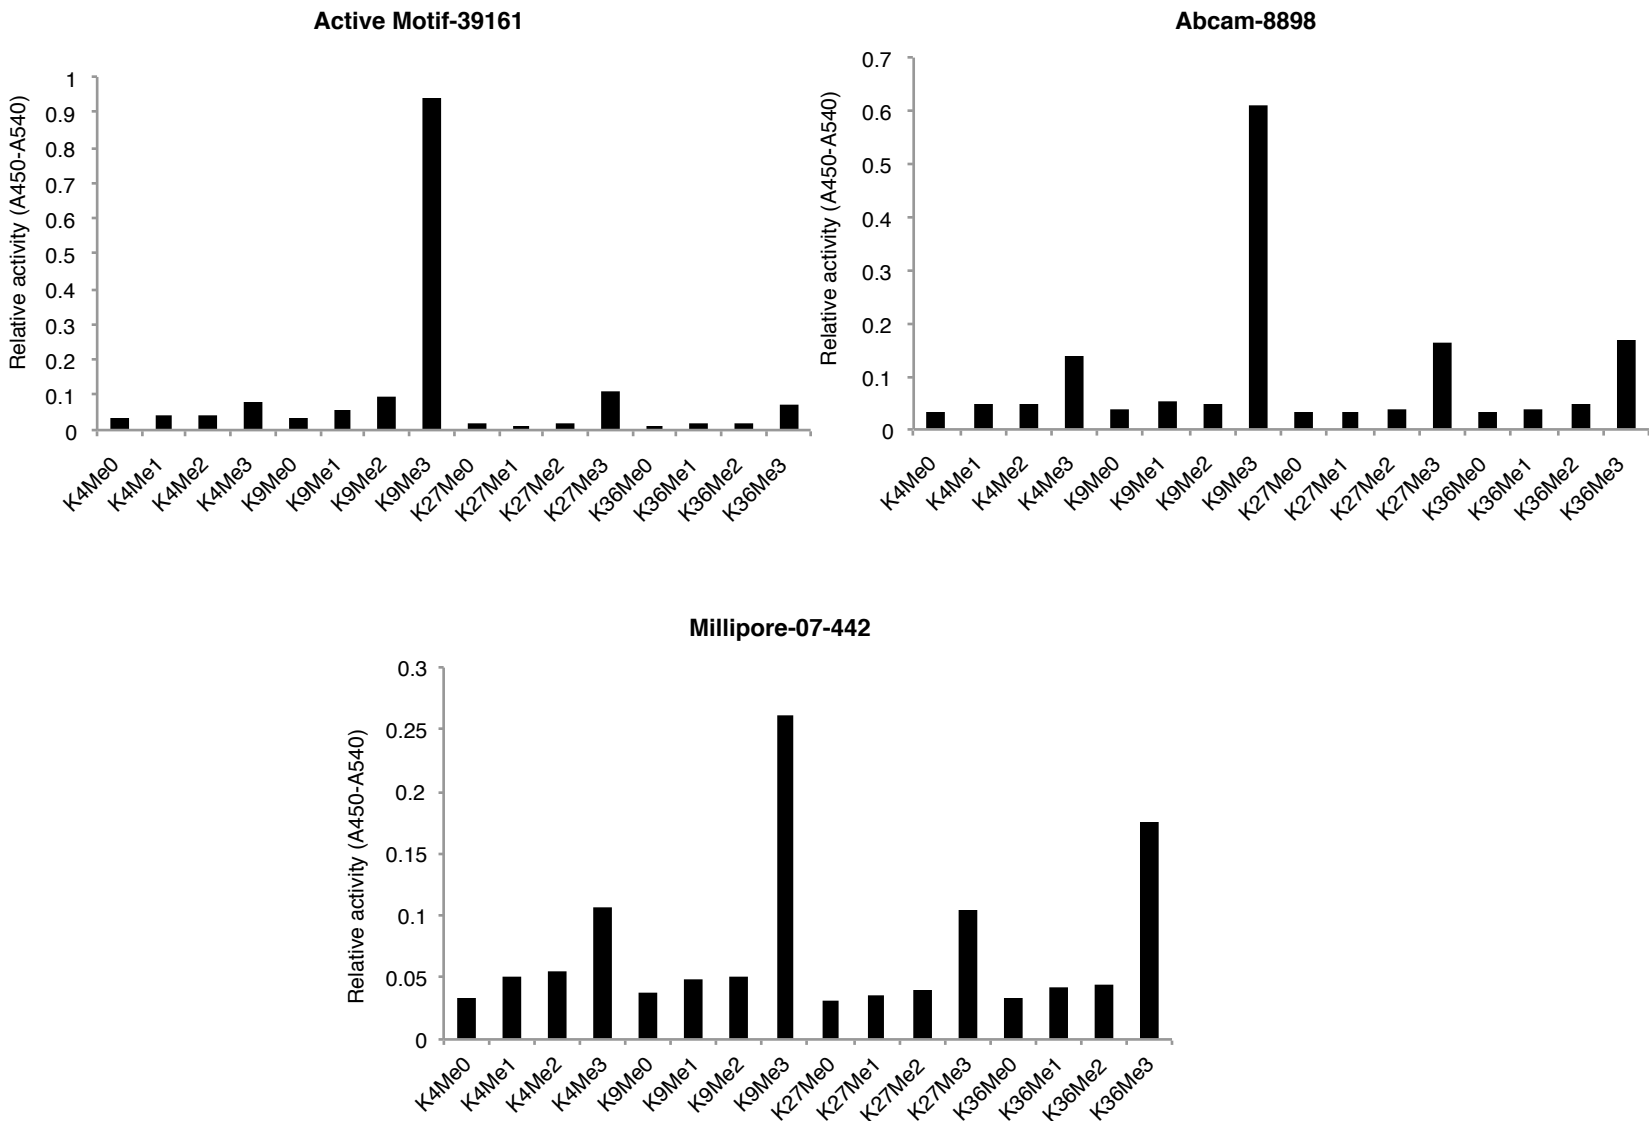



**Figure S2**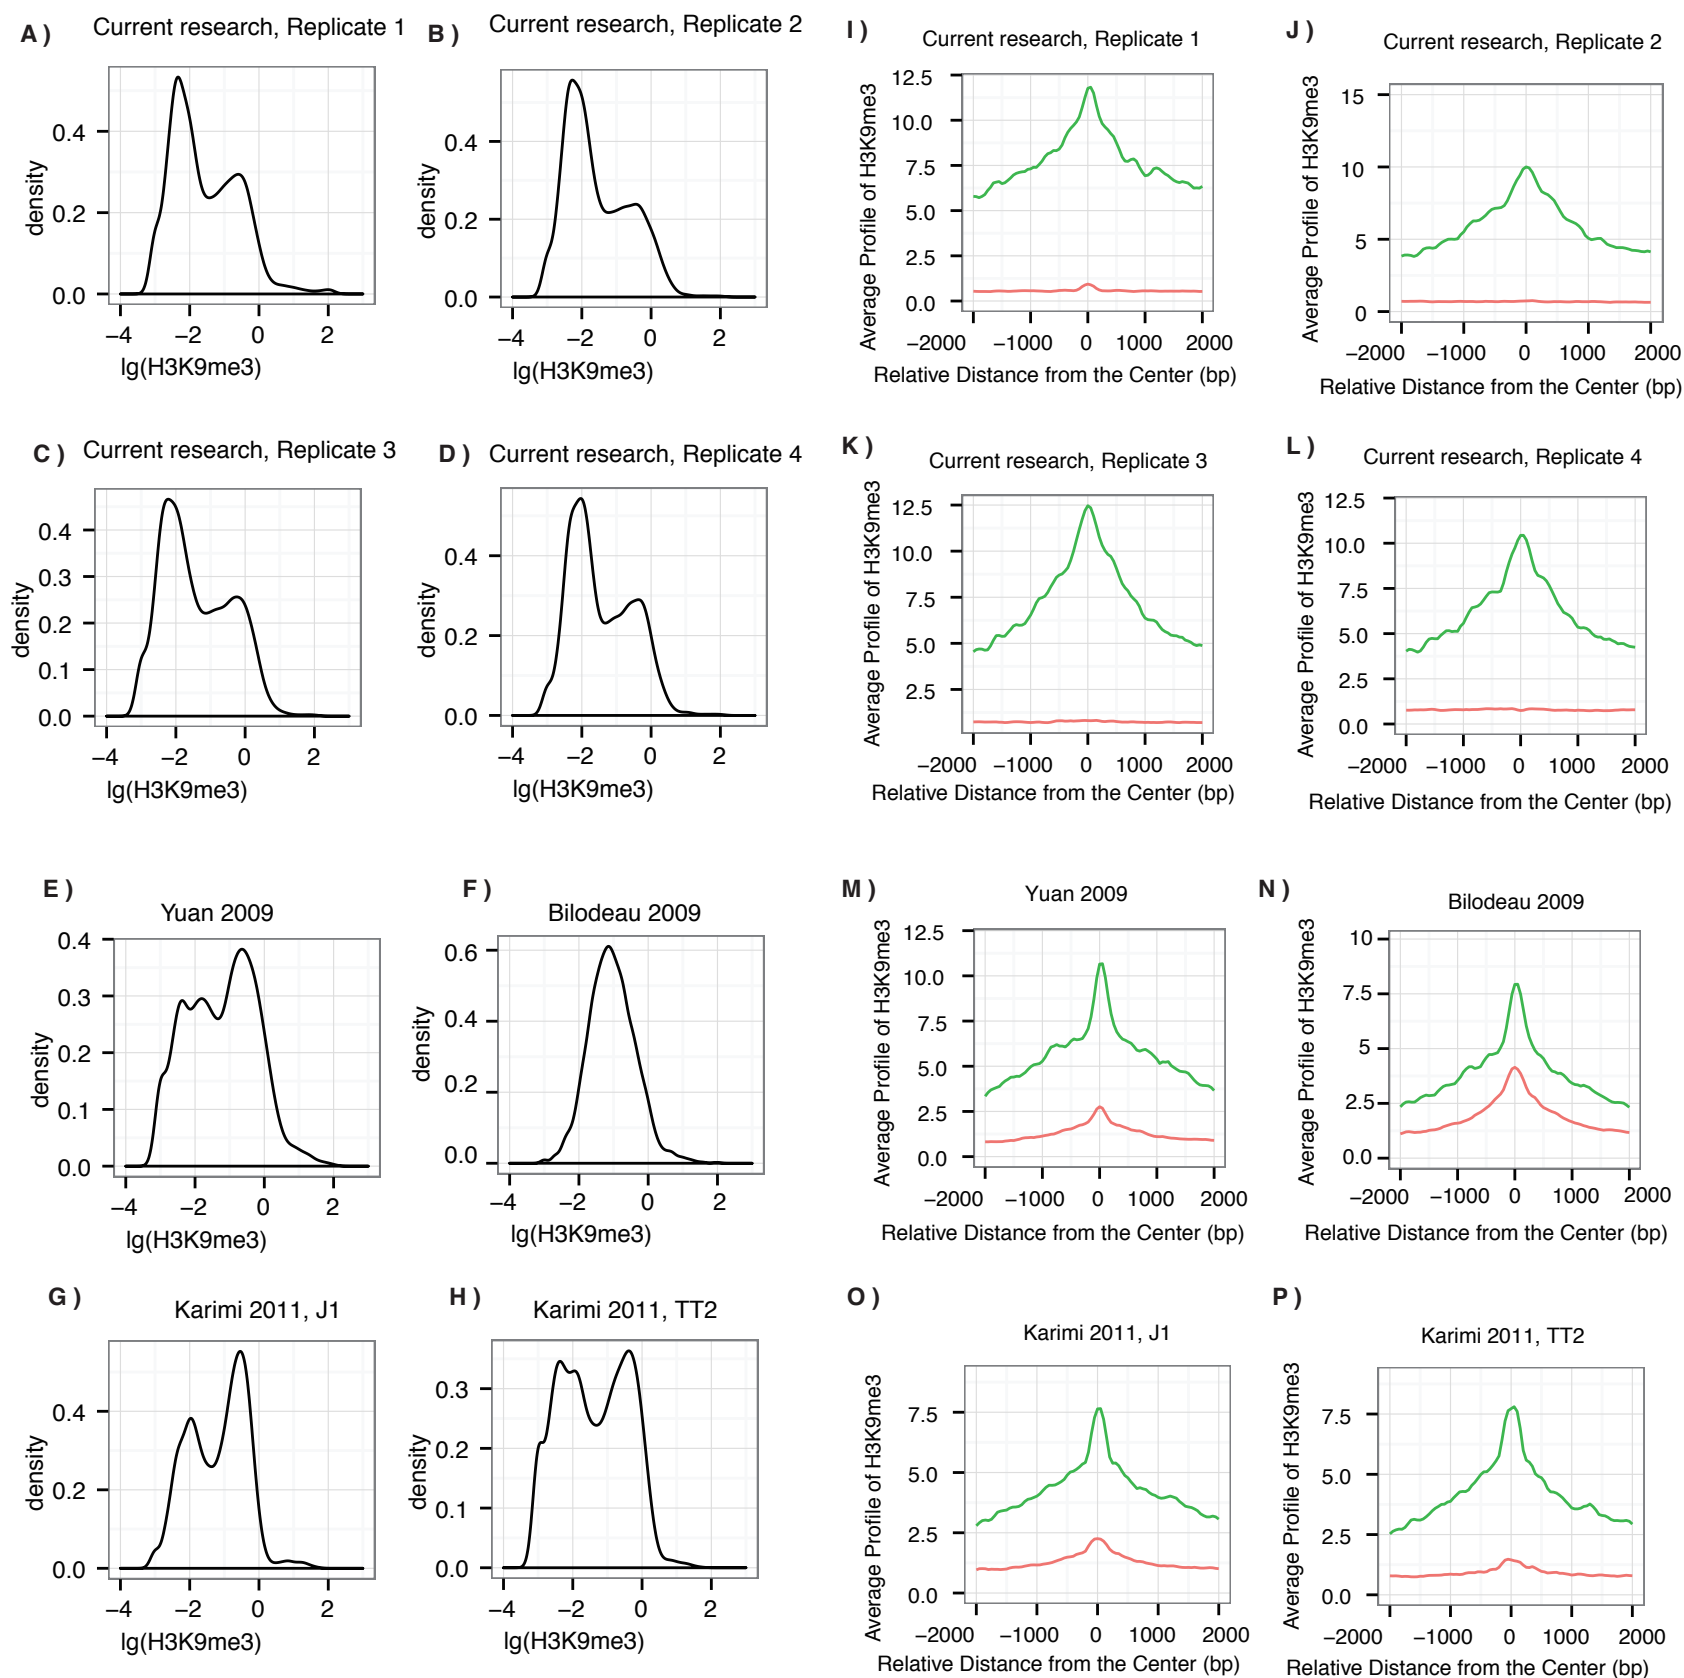

— Solo — Ensemble

**Figure S3**

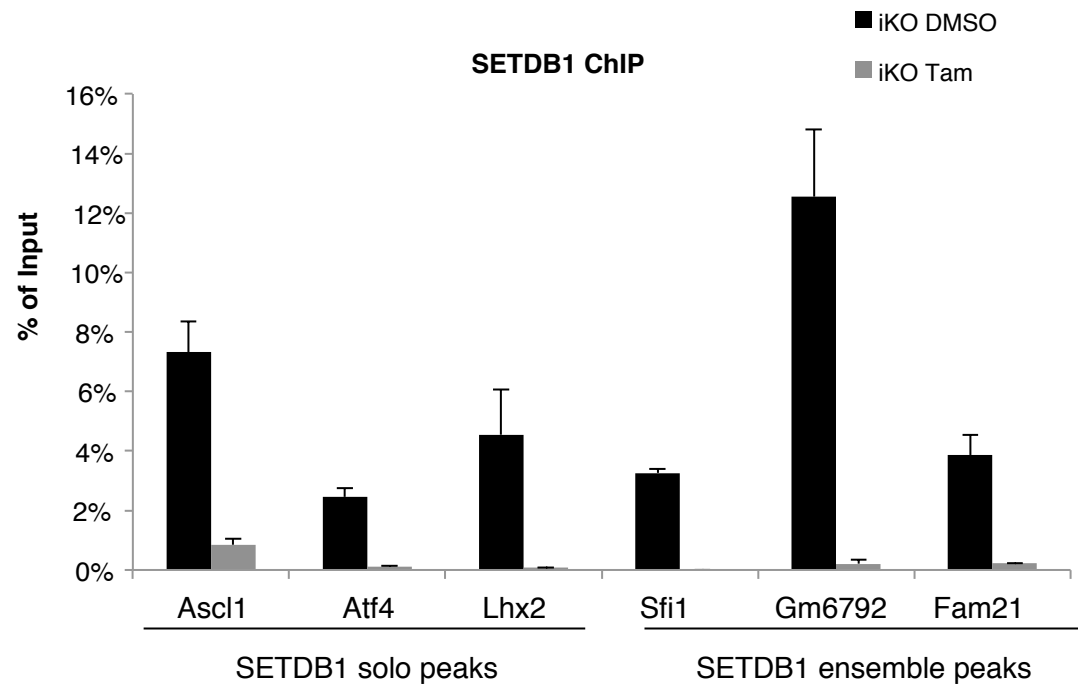

Figure S4

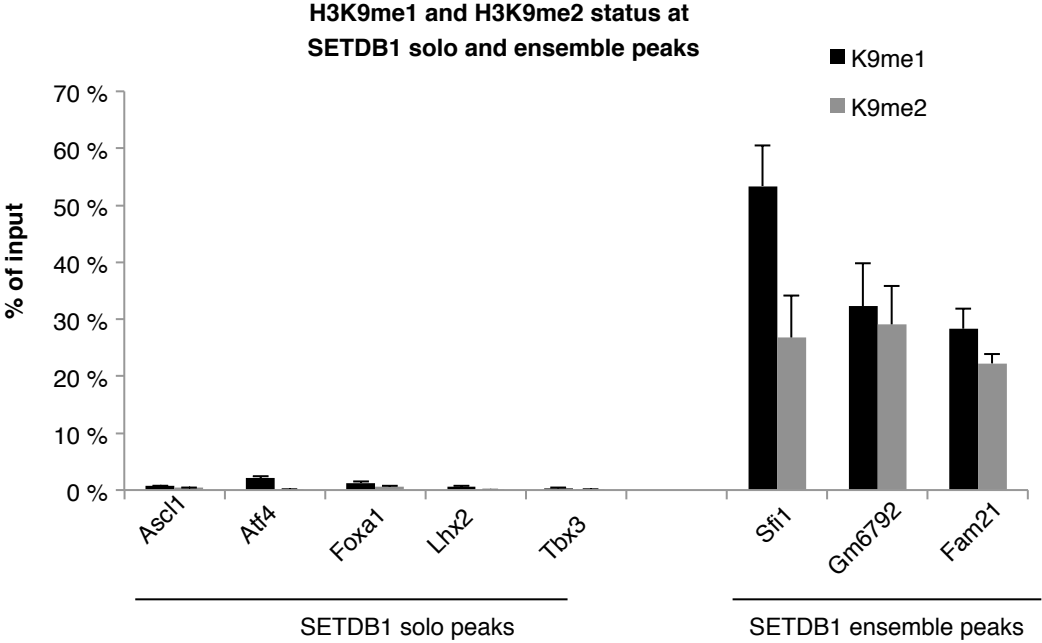

**Figure S5**

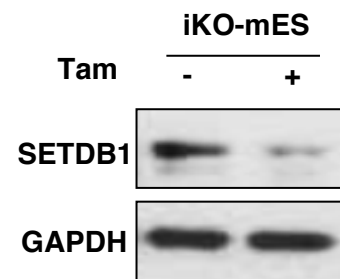

**Figure S6**

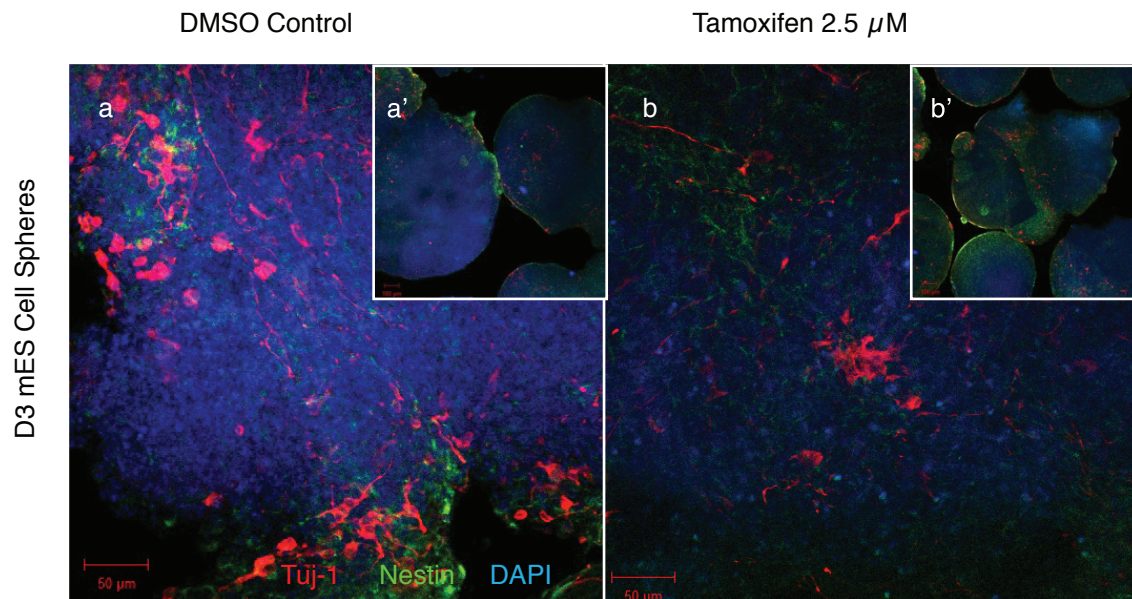

Figure S7

A)

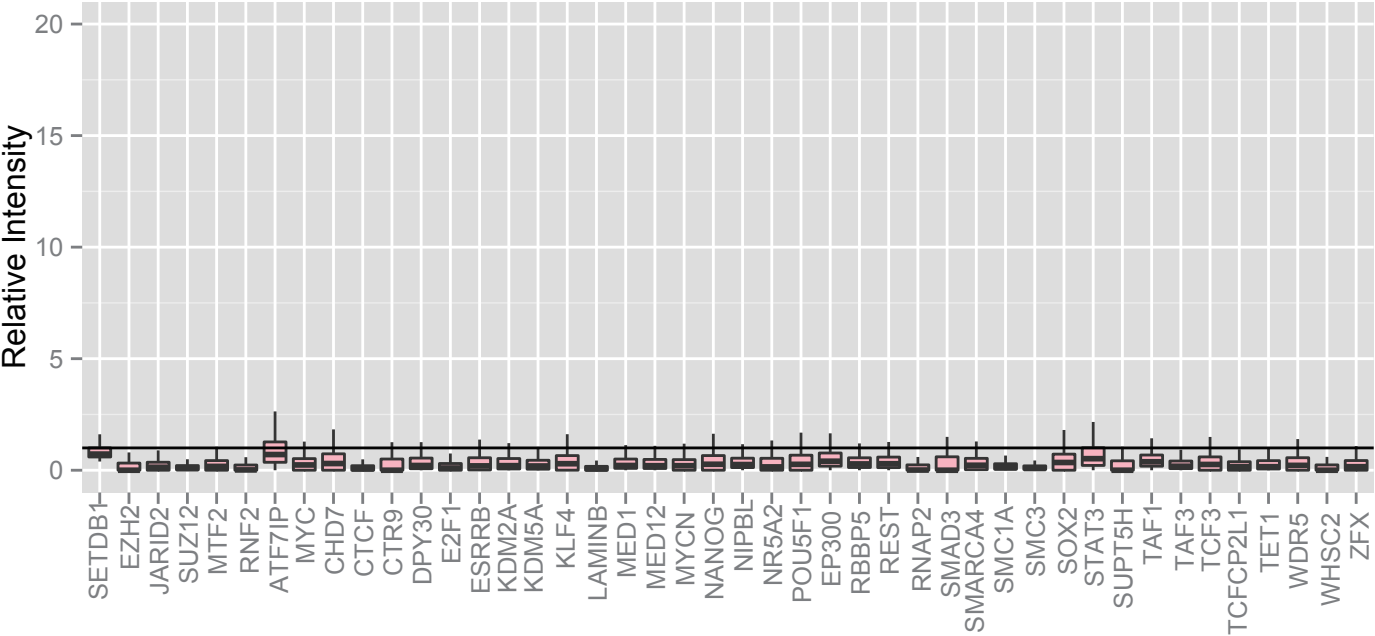

B)

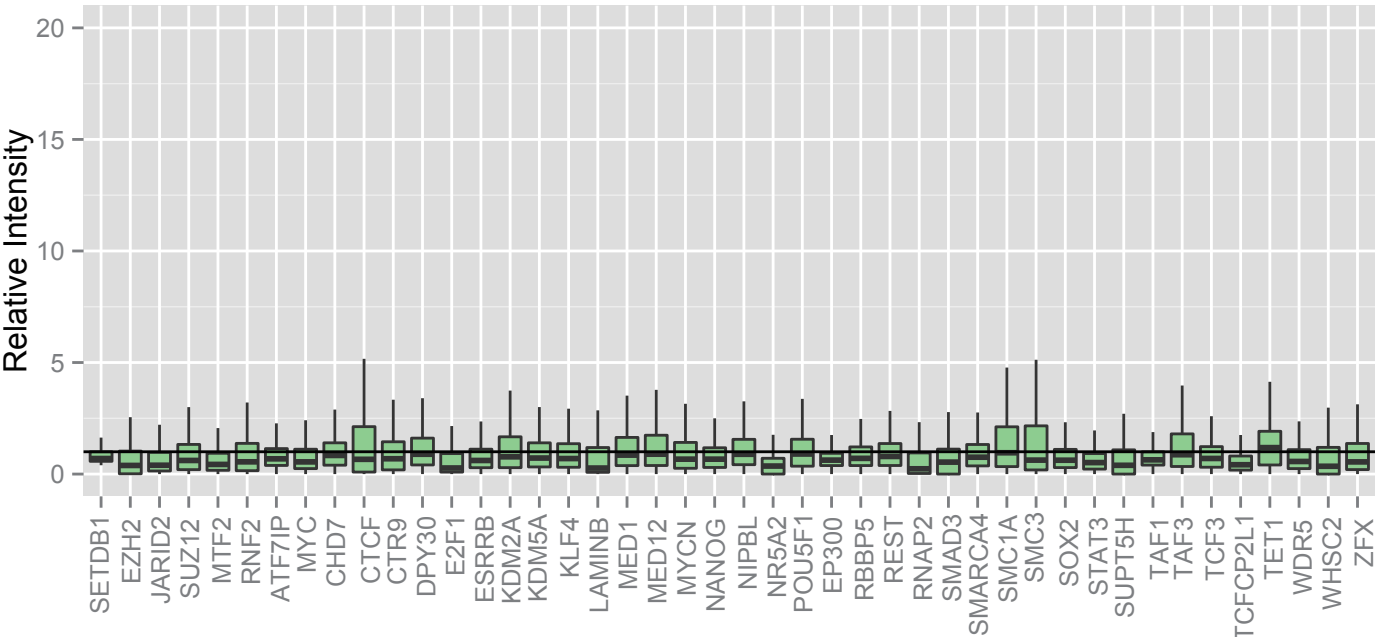

Figure S8

A)

| SETDB1 solo peak Group | H3K9me3 MACS2 callpeak Cutoff | Solo Peak number | Gene number (Refseq ID) |
|------------------------|-------------------------------|------------------|-------------------------|
| Loose                  | q 0.01 ~ q 0.001              | 534              | 189                     |
| Moderate               | p 0.001 ~ q 0.01              | 579              | 185                     |
| Stringent              | p 0.001                       | 2110             | 1260                    |

B)

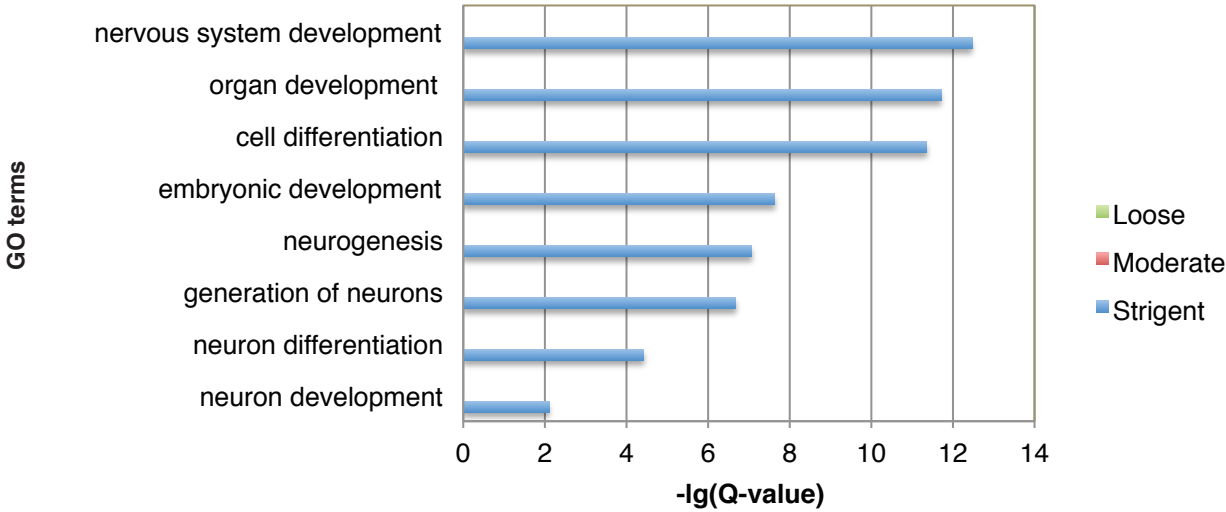

Figure S9

A)

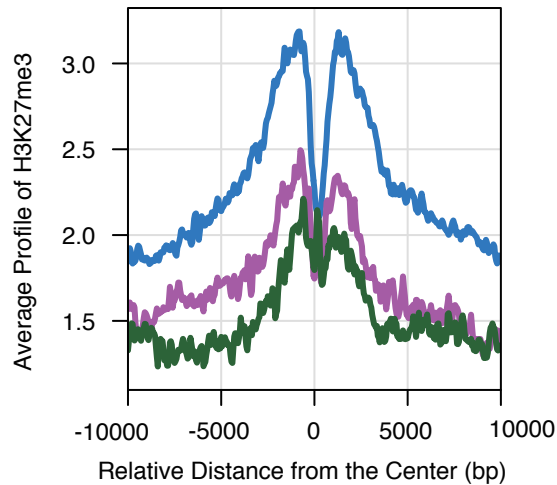

B)

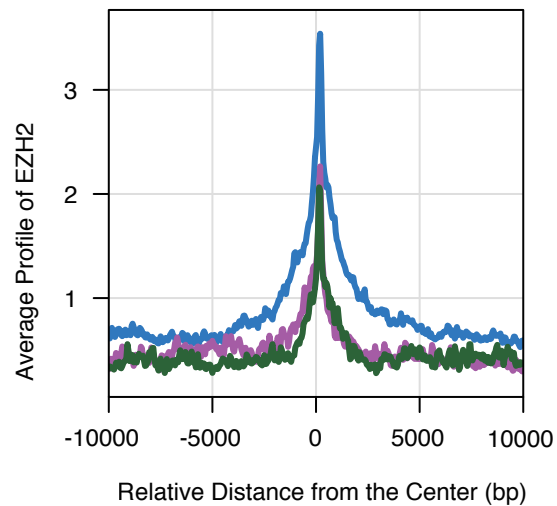

C)

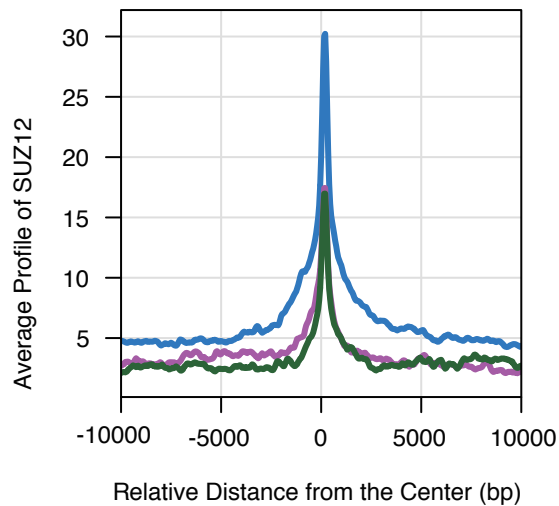

D)

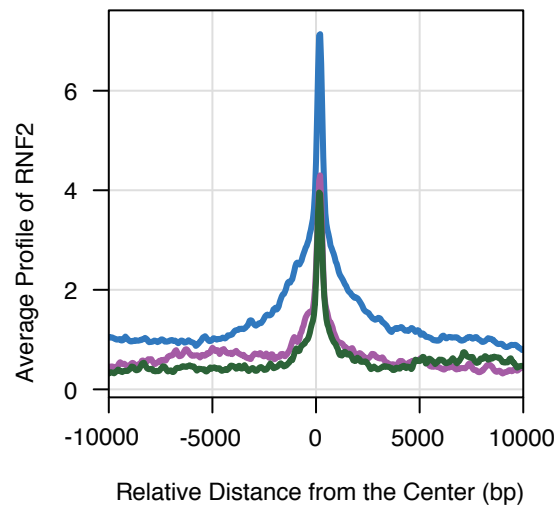

Stringent — Moderate — Loose — Strict



Figure S10

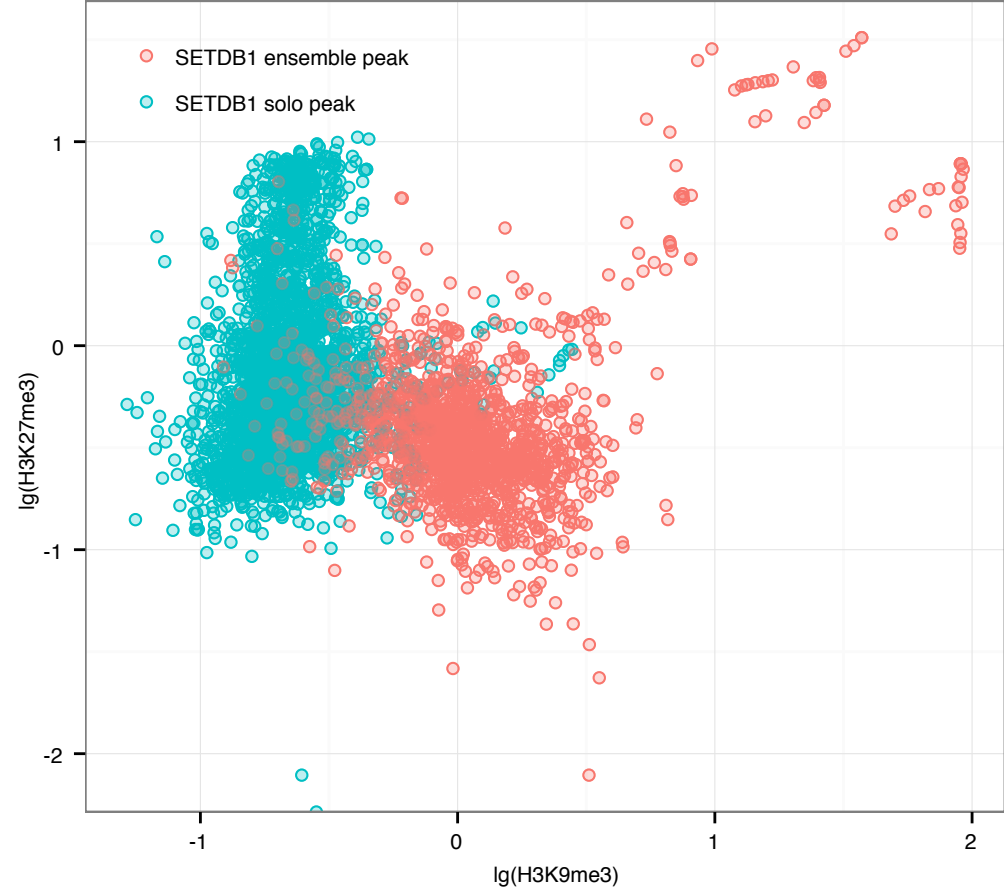

**Figure S11**

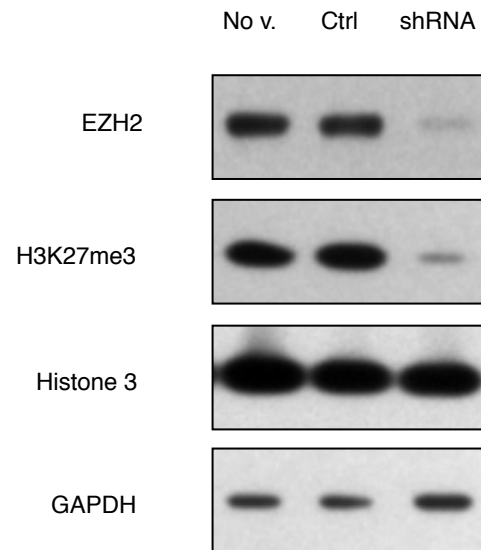

Figure S12

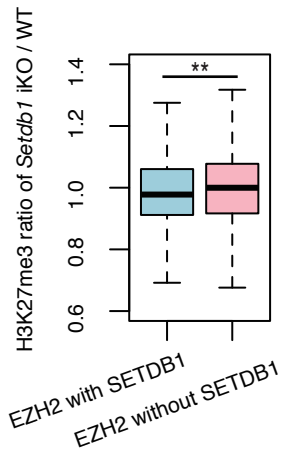

**Figure S13**

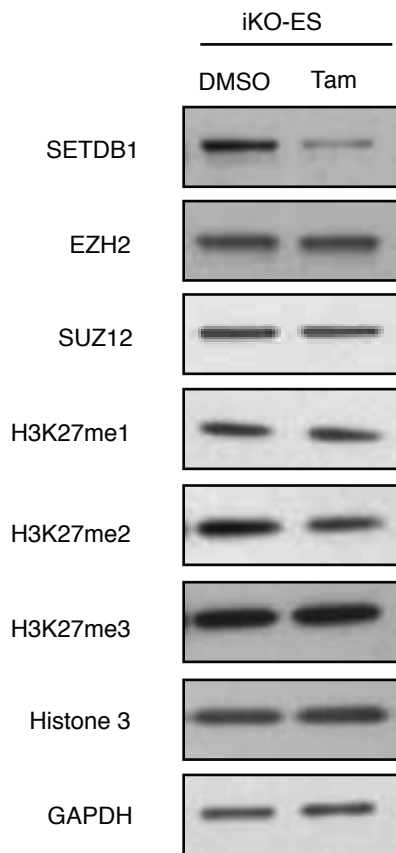

**Figure S14**

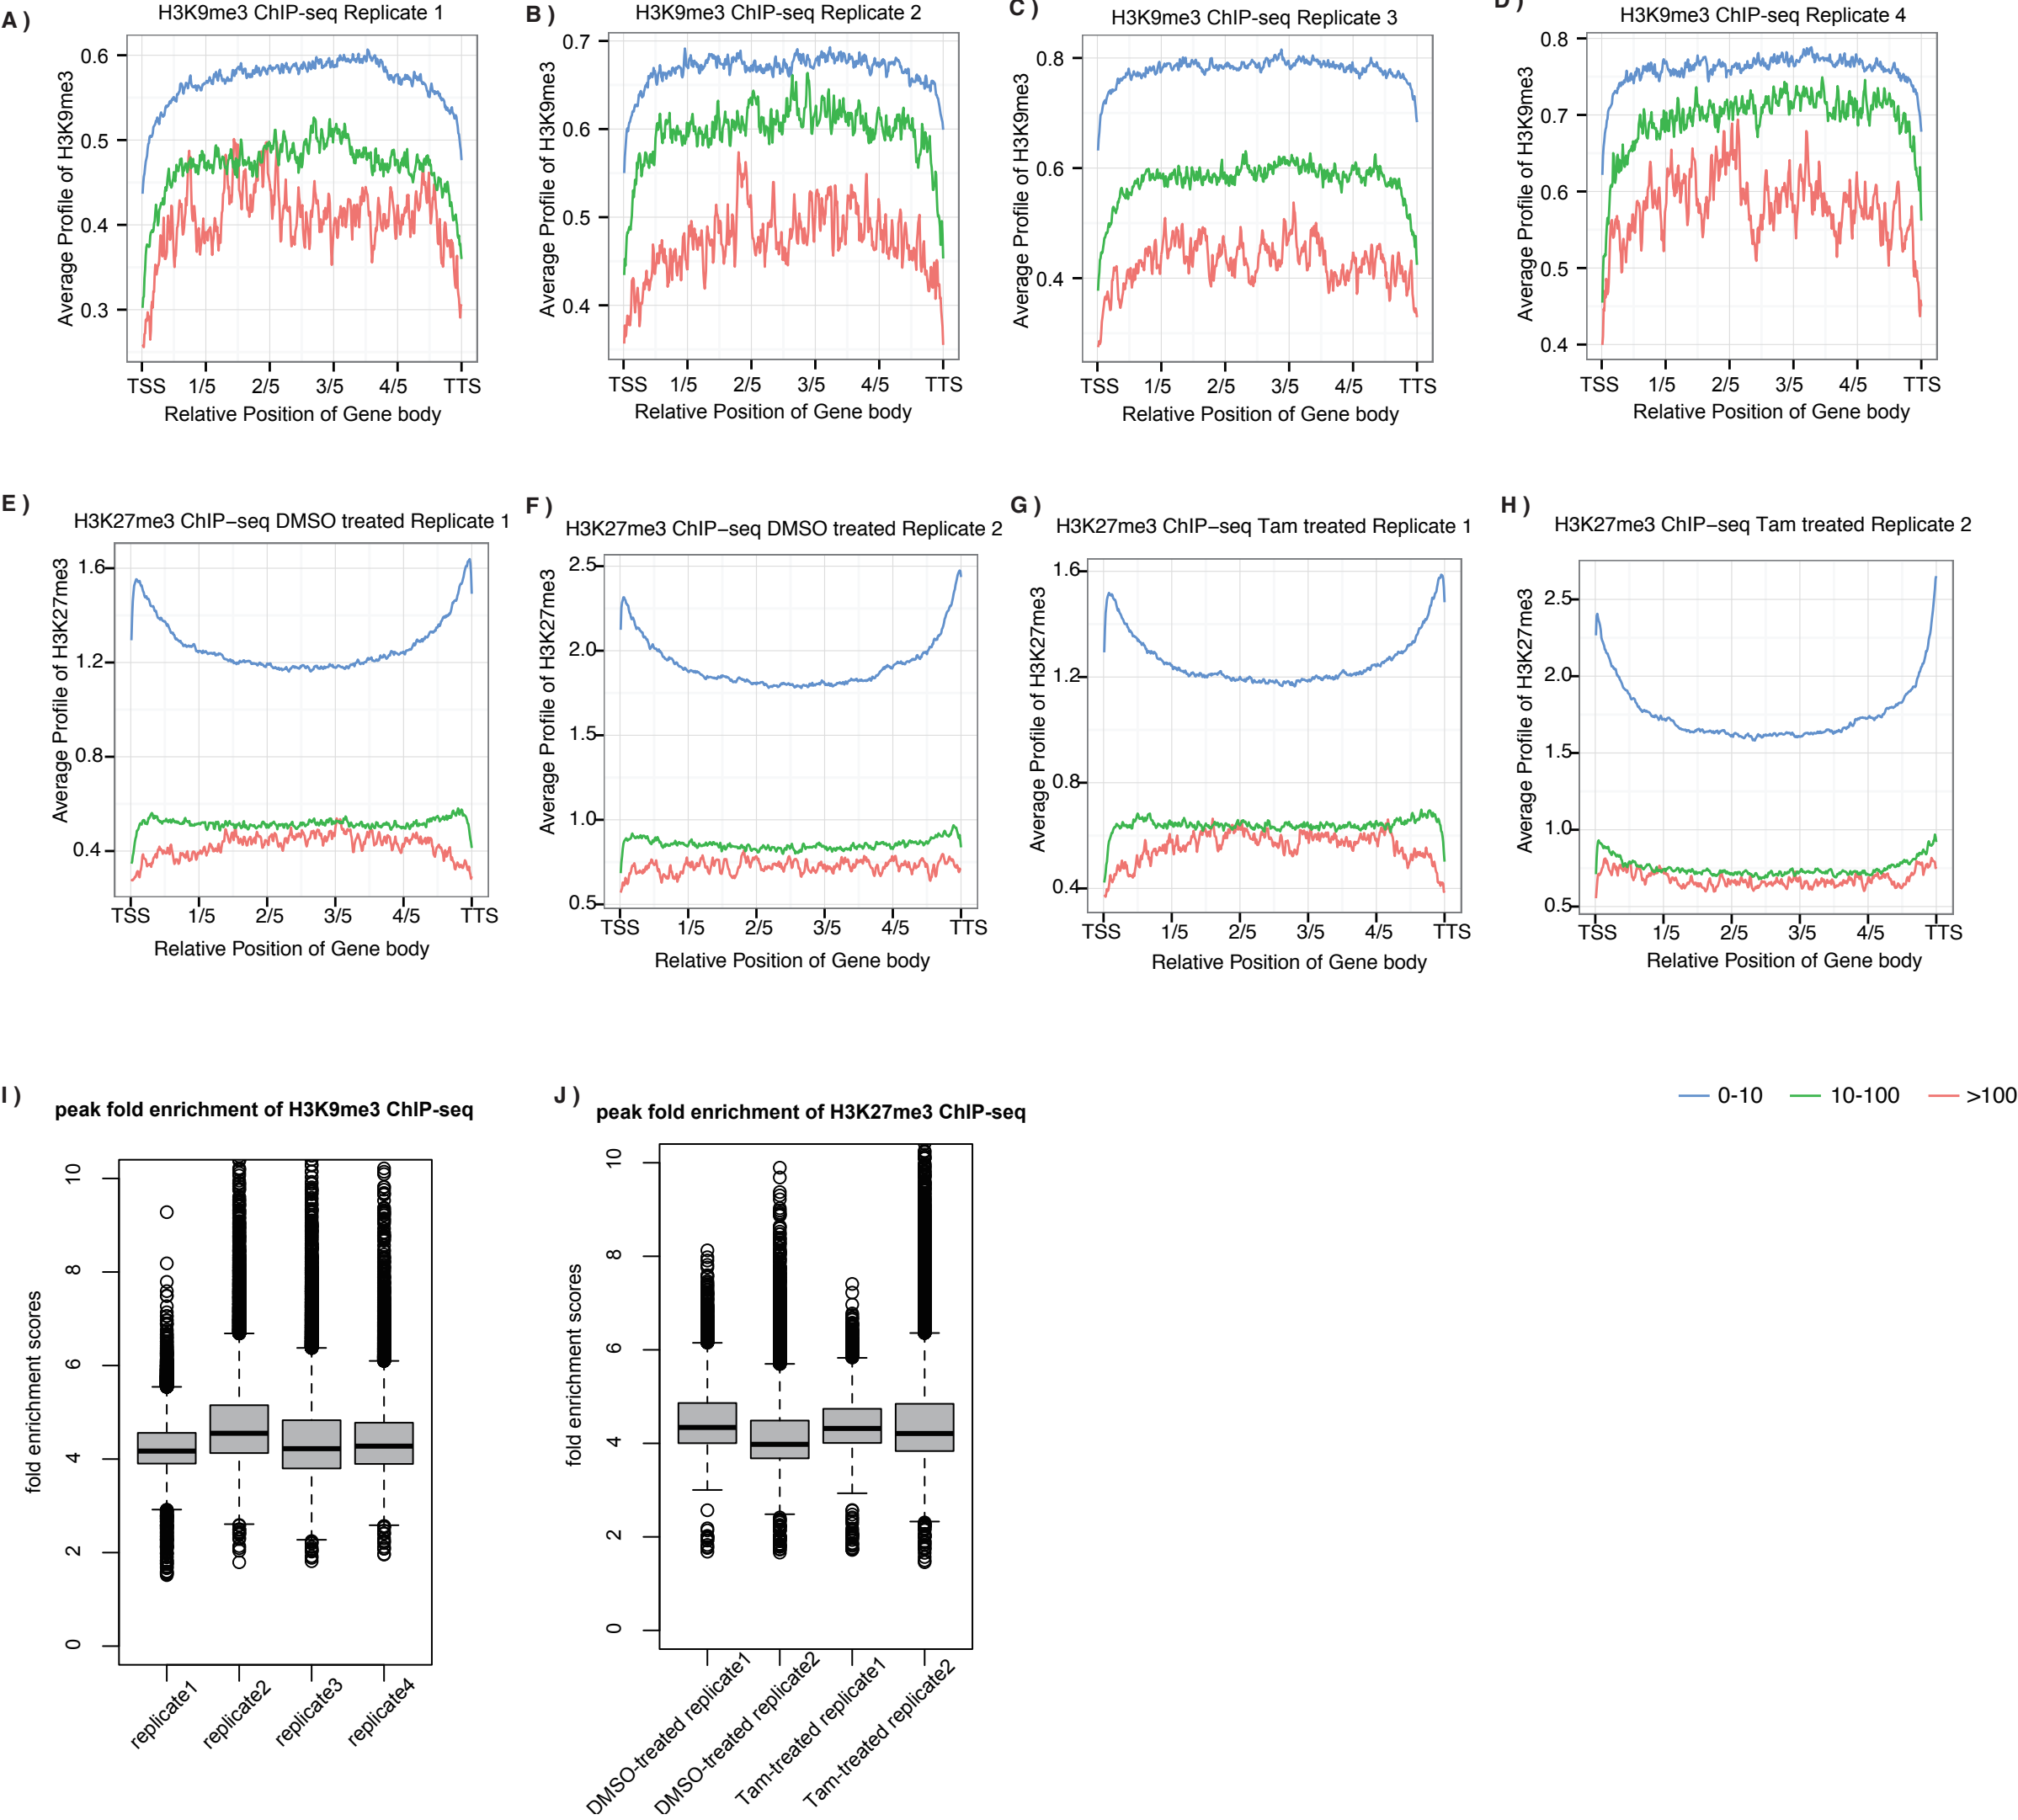

Figure S15

A)

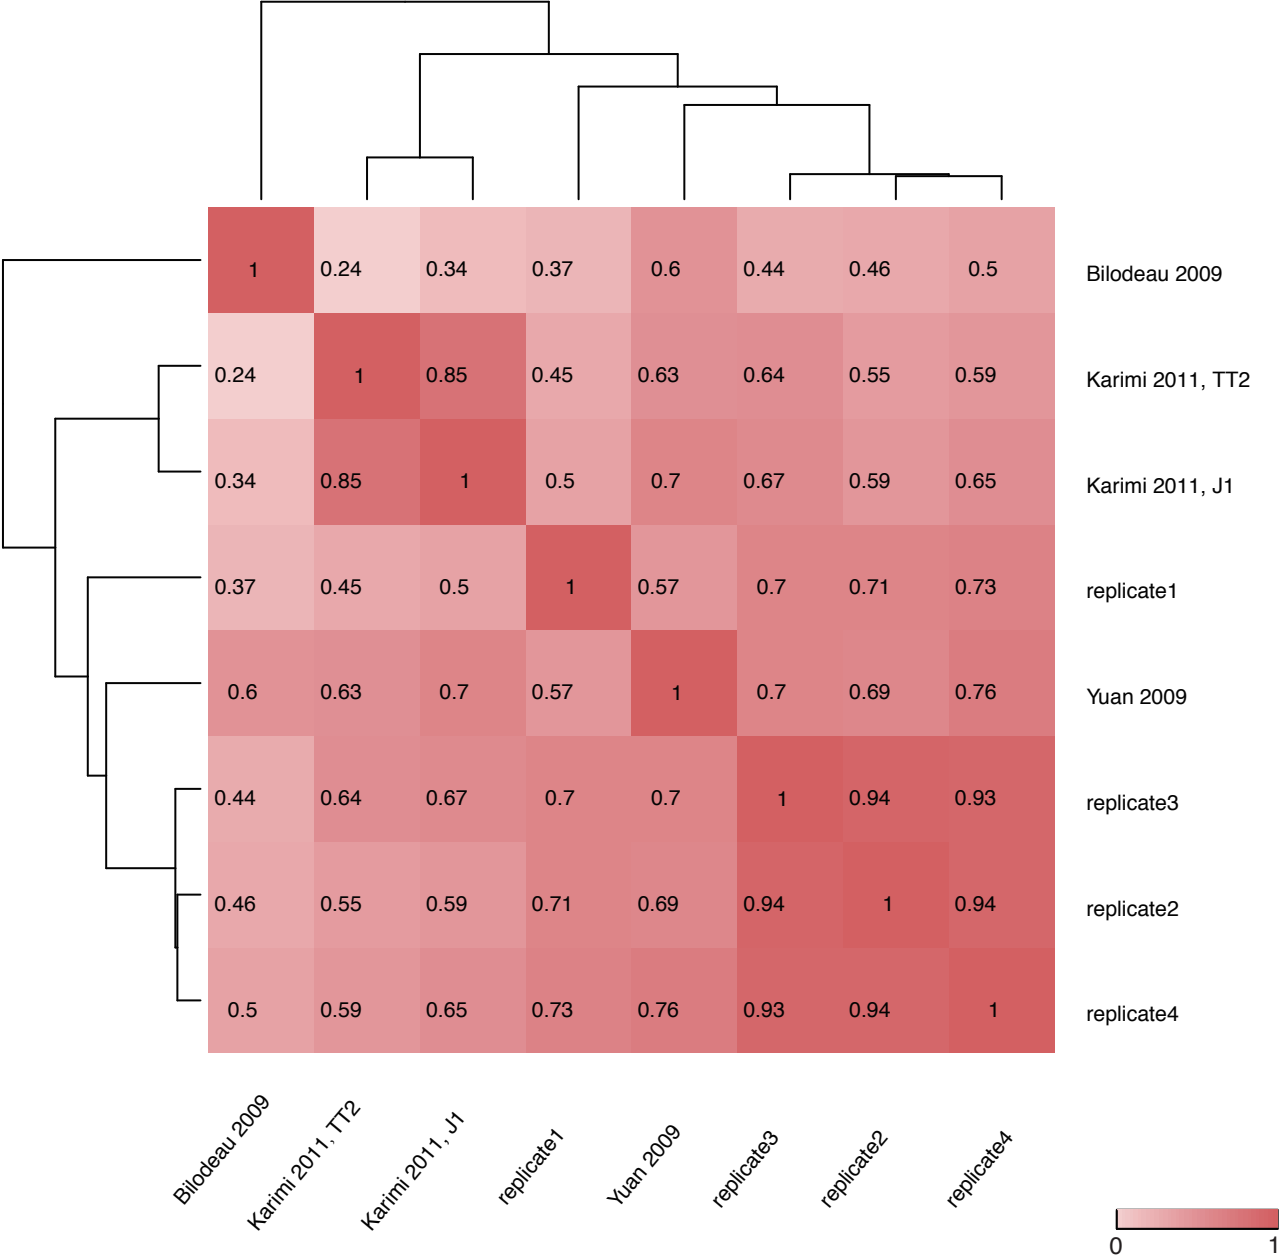

B)

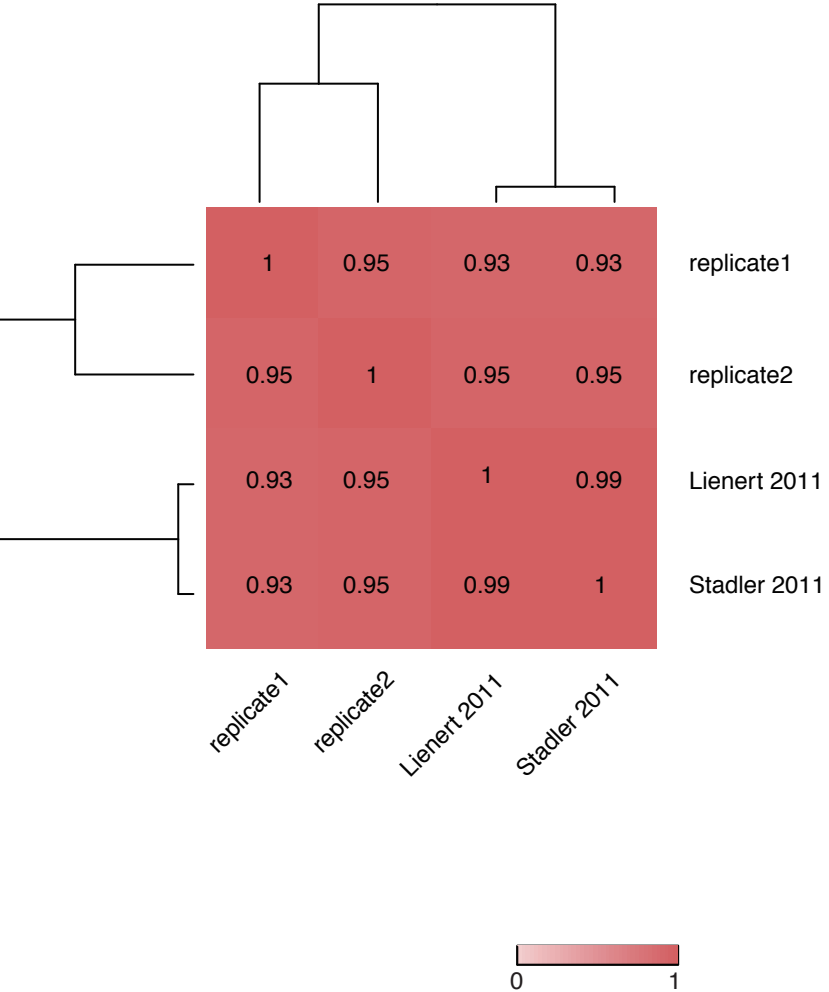

Supplement: Supplemental_Material.pdf [file Supplemental_Material.pdf]
